# Supplementary material
Source: publisher figshare collection journal article supplement (https://acs.figshare.com/ndownloader/files/6010974)
Supplement: Supplementary file 1 [file 6010974]

 
data_a 
 
_audit_creation_method            SHELXL-97 
_chemical_name_systematic 
; 
 ? 
; 
_chemical_name_common             ? 
_chemical_melting_point           ? 
_chemical_formula_moiety          ? 
_chemical_formula_sum 
 'C32 H29 N O6 S' 
_chemical_formula_weight          555.62 
 
loop_ 
 _atom_type_symbol 
 _atom_type_description 
 _atom_type_scat_dispersion_real 
 _atom_type_scat_dispersion_imag 
 _atom_type_scat_source 
 'C'  'C'   0.0033   0.0016 
 'International Tables Vol C Tables 4.2.6.8 and 6.1.1.4' 
 'H'  'H'   0.0000   0.0000 
 'International Tables Vol C Tables 4.2.6.8 and 6.1.1.4' 
 'N'  'N'   0.0061   0.0033 
 'International Tables Vol C Tables 4.2.6.8 and 6.1.1.4' 
 'O'  'O'   0.0106   0.0060 
 'International Tables Vol C Tables 4.2.6.8 and 6.1.1.4' 
 'S'  'S'   0.1246   0.1234 
 'International Tables Vol C Tables 4.2.6.8 and 6.1.1.4' 
 
_symmetry_cell_setting             'Monoclinic'
_symmetry_space_group_name_H-M    'P2(1)/n  '
 
loop_ 
 _symmetry_equiv_pos_as_xyz 
 'x, y, z' 
 '-x+1/2, y+1/2, -z+1/2' 
 '-x, -y, -z' 
 'x-1/2, -y-1/2, z-1/2' 
 
_cell_length_a                    11.089(2) 
_cell_length_b                    21.075(4) 
_cell_length_c                    12.128(2) 
_cell_angle_alpha                 90.00 
_cell_angle_beta                  97.24(3) 
_cell_angle_gamma                 90.00 
_cell_volume                      2811.6(10) 
_cell_formula_units_Z             4 
_cell_measurement_temperature     293(2) 
_cell_measurement_reflns_used     8399
_cell_measurement_theta_min       1.8511 
_cell_measurement_theta_max       27.8644
 
_exptl_crystal_description        prism
_exptl_crystal_colour             colorless
_exptl_crystal_size_max           0.20 
_exptl_crystal_size_mid           0.20 
_exptl_crystal_size_min           0.20 
_exptl_crystal_density_meas       ? 
_exptl_crystal_density_diffrn     1.316 
_exptl_crystal_density_method     'not measured' 
_exptl_crystal_F_000              1368 
_exptl_absorpt_coefficient_mu     0.163 
_exptl_absorpt_correction_type     'Multi-scan' 
_exptl_absorpt_correction_T_min   0.8523 
_exptl_absorpt_correction_T_max   1.0000 
_exptl_absorpt_process_details    ? 
 
_exptl_special_details 
; 
 ? 
; 
 
_diffrn_ambient_temperature       293(2) 
_diffrn_radiation_wavelength      0.71073 
_diffrn_radiation_type            MoK\a 
_diffrn_radiation_source          'fine-focus sealed tube' 
_diffrn_radiation_monochromator   graphite 
_diffrn_measurement_device_type   'CCD'
_diffrn_measurement_method         'dtprofit.ref'
_diffrn_detector_area_resol_mean  28.5714
_diffrn_standards_number          6832
_diffrn_standards_interval_count  ? 
_diffrn_standards_interval_time   ? 
_diffrn_standards_decay_%         ? 
_diffrn_reflns_number             6832 
_diffrn_reflns_av_R_equivalents   0.0320 
_diffrn_reflns_av_sigmaI/detI     0.0917 
_diffrn_reflns_limit_h_min        -13 
_diffrn_reflns_limit_h_max        13 
_diffrn_reflns_limit_k_min        -21 
_diffrn_reflns_limit_k_max        25 
_diffrn_reflns_limit_l_min        -14 
_diffrn_reflns_limit_l_max        12 
_diffrn_reflns_theta_min          1.8511 
_diffrn_reflns_theta_max          27.8644 
_reflns_number_total              6832 
_reflns_number_gt                 4876 
_reflns_threshold_expression      >2sigma(I) 
 
_computing_data_collection         'CrystalClear (Rigaku/MSC Inc., 2006)'
_computing_cell_refinement         'CrystalClear (Rigaku/MSC Inc., 2006)'
_computing_data_reduction          'CrystalClear (Rigaku/MSC Inc., 2006)' 
_computing_structure_solution     'SHELXS-97 (Sheldrick, 1990)' 
_computing_structure_refinement   'SHELXL-97 (Sheldrick, 1997)' 
_computing_molecular_graphics     'Bruker SHELXTL' 
_computing_publication_material   'Bruker SHELXTL'
 
_refine_special_details 
; 
 Refinement of F^2^ against ALL reflections.  The weighted R-factor wR and 
 goodness of fit S are based on F^2^, conventional R-factors R are based 
 on F, with F set to zero for negative F^2^. The threshold expression of 
 F^2^ > 2sigma(F^2^) is used only for calculating R-factors(gt) etc. and is 
 not relevant to the choice of reflections for refinement.  R-factors based 
 on F^2^ are statistically about twice as large as those based on F, and R- 
 factors based on ALL data will be even larger. 
; 
 
_refine_ls_structure_factor_coef  Fsqd  
_refine_ls_matrix_type            full 
_refine_ls_weighting_scheme       calc  
_refine_ls_weighting_details 
 'calc w=1/[\s^2^(Fo^2^)+(0.1000P)^2^+0.0357P] where P=(Fo^2^+2Fc^2^)/3' 
_atom_sites_solution_primary      direct 
_atom_sites_solution_secondary    difmap 
_atom_sites_solution_hydrogens    geom 
_refine_ls_hydrogen_treatment     mixed 
_refine_ls_extinction_method      none 
_refine_ls_extinction_coef        ? 
_refine_ls_number_reflns          5509 
_refine_ls_number_parameters      364 
_refine_ls_number_restraints      0 
_refine_ls_R_factor_all           0.0747 
_refine_ls_R_factor_gt            0.0645 
_refine_ls_wR_factor_ref          0.1994 
_refine_ls_wR_factor_gt           0.1919 
_refine_ls_goodness_of_fit_ref    1.295 
_refine_ls_restrained_S_all       1.295 
_refine_ls_shift/su_max           0.001 
_refine_ls_shift/su_mean          0.000 
 
loop_ 
 _atom_site_label 
 _atom_site_type_symbol 
 _atom_site_fract_x 
 _atom_site_fract_y 
 _atom_site_fract_z 
 _atom_site_U_iso_or_equiv 
 _atom_site_adp_type 
 _atom_site_occupancy 
 _atom_site_symmetry_multiplicity 
 _atom_site_calc_flag 
 _atom_site_refinement_flags 
 _atom_site_disorder_assembly 
 _atom_site_disorder_group 
S1 S 1.03380(6) 0.11834(3) 0.71293(5) 0.0539(2) Uani 1 1 d . . . 
O1 O 0.42343(16) 0.22440(10) 0.83885(16) 0.0719(6) Uani 1 1 d . . . 
O2 O 0.48661(17) 0.14844(11) 0.72090(17) 0.0758(6) Uani 1 1 d . . . 
O3 O 0.83276(15) 0.29304(8) 0.96307(13) 0.0527(4) Uani 1 1 d . . . 
O4 O 1.12886(17) 0.07358(10) 0.74287(18) 0.0773(6) Uani 1 1 d . . . 
O5 O 1.06293(19) 0.17890(9) 0.67013(16) 0.0707(6) Uani 1 1 d . . . 
O6 O 0.8573(2) 0.47234(10) 0.55140(18) 0.0844(7) Uani 1 1 d . . . 
N1 N 0.96701(18) 0.13116(9) 0.82393(16) 0.0492(5) Uani 1 1 d . . . 
C1 C 0.3866(3) 0.18774(18) 0.7397(3) 0.0804(9) Uani 1 1 d . . . 
H1A H 0.3164 0.1619 0.7495 0.096 Uiso 1 1 calc R . . 
H1B H 0.3652 0.2157 0.6768 0.096 Uiso 1 1 calc R . . 
C2 C 0.5871(2) 0.17885(13) 0.7769(2) 0.0546(6) Uani 1 1 d . . . 
C3 C 0.7067(2) 0.16685(12) 0.77183(19) 0.0508(6) Uani 1 1 d . . . 
H3 H 0.7308 0.1348 0.7267 0.061 Uiso 1 1 calc R . . 
C4 C 0.7933(2) 0.20483(11) 0.83770(18) 0.0438(5) Uani 1 1 d . . . 
C5 C 0.7508(2) 0.25358(11) 0.90164(18) 0.0464(5) Uani 1 1 d . . . 
C6 C 0.6289(2) 0.26309(12) 0.9108(2) 0.0527(6) Uani 1 1 d . . . 
H6 H 0.6029 0.2937 0.9578 0.063 Uiso 1 1 calc R . . 
C7 C 0.5489(2) 0.22477(13) 0.8465(2) 0.0552(6) Uani 1 1 d . . . 
C8 C 0.9243(2) 0.19315(11) 0.84994(18) 0.0442(5) Uani 1 1 d . . . 
C9 C 1.0018(2) 0.23799(11) 0.89339(19) 0.0474(5) Uani 1 1 d . . . 
C10 C 0.9466(2) 0.30144(11) 0.9158(2) 0.0492(6) Uani 1 1 d . . . 
H10 H 1.0035 0.3227 0.9724 0.059 Uiso 1 1 calc R . . 
C11 C 0.9279(2) 0.34531(11) 0.81556(19) 0.0488(5) Uani 1 1 d . . . 
C12 C 0.9432(3) 0.32647(13) 0.7085(2) 0.0688(8) Uani 1 1 d . . . 
H12 H 0.9692 0.2853 0.6970 0.083 Uiso 1 1 calc R . . 
C13 C 0.9211(3) 0.36706(14) 0.6182(2) 0.0735(8) Uani 1 1 d . . . 
H13 H 0.9318 0.3531 0.5474 0.088 Uiso 1 1 calc R . . 
C14 C 0.8833(2) 0.42819(13) 0.6342(2) 0.0603(7) Uani 1 1 d . . . 
C15 C 0.8685(3) 0.44827(14) 0.7403(3) 0.0742(8) Uani 1 1 d . . . 
H15 H 0.8432 0.4895 0.7519 0.089 Uiso 1 1 calc R . . 
C16 C 0.8913(3) 0.40736(13) 0.8285(2) 0.0643(7) Uani 1 1 d . . . 
H16 H 0.8818 0.4218 0.8993 0.077 Uiso 1 1 calc R . . 
C17 C 0.8681(4) 0.45321(19) 0.4400(3) 0.0954(11) Uani 1 1 d . . . 
H17A H 0.9503 0.4405 0.4348 0.143 Uiso 1 1 calc R . . 
H17B H 0.8468 0.4881 0.3904 0.143 Uiso 1 1 calc R . . 
H17C H 0.8144 0.4182 0.4199 0.143 Uiso 1 1 calc R . . 
C18 C 0.9297(3) 0.07523(12) 0.8869(2) 0.0610(7) Uani 1 1 d . . . 
H18A H 0.9849 0.0402 0.8795 0.073 Uiso 1 1 calc R . . 
H18B H 0.8486 0.0620 0.8562 0.073 Uiso 1 1 calc R . . 
C19 C 0.9311(2) 0.09139(11) 1.0083(2) 0.0545(6) Uani 1 1 d . . . 
C20 C 1.0393(3) 0.10015(14) 1.0761(2) 0.0691(8) Uani 1 1 d . . . 
H20 H 1.1122 0.0938 1.0473 0.083 Uiso 1 1 calc R . . 
C21 C 1.0419(3) 0.11802(15) 1.1854(3) 0.0806(9) Uani 1 1 d . . . 
H21 H 1.1160 0.1242 1.2293 0.097 Uiso 1 1 calc R . . 
C22 C 0.9359(4) 0.12663(16) 1.2296(3) 0.0860(10) Uani 1 1 d . . . 
H22 H 0.9374 0.1387 1.3035 0.103 Uiso 1 1 calc R . . 
C23 C 0.8273(4) 0.11735(18) 1.1644(3) 0.0913(11) Uani 1 1 d . . . 
H23 H 0.7550 0.1226 1.1948 0.110 Uiso 1 1 calc R . . 
C24 C 0.8235(3) 0.10014(16) 1.0532(3) 0.0742(8) Uani 1 1 d . . . 
H24 H 0.7492 0.0945 1.0094 0.089 Uiso 1 1 calc R . . 
C25 C 0.9271(2) 0.08090(12) 0.61481(19) 0.0500(6) Uani 1 1 d . . . 
C26 C 0.8488(3) 0.11703(14) 0.5410(2) 0.0637(7) Uani 1 1 d . . . 
H26 H 0.8545 0.1611 0.5417 0.076 Uiso 1 1 calc R . . 
C27 C 0.7633(3) 0.08712(17) 0.4675(2) 0.0720(8) Uani 1 1 d . . . 
H27 H 0.7107 0.1114 0.4188 0.086 Uiso 1 1 calc R . . 
C28 C 0.7532(3) 0.02154(17) 0.4638(2) 0.0687(8) Uani 1 1 d . . . 
C29 C 0.8328(3) -0.01386(14) 0.5368(2) 0.0671(7) Uani 1 1 d . . . 
H29 H 0.8285 -0.0579 0.5346 0.081 Uiso 1 1 calc R . . 
C30 C 0.9188(2) 0.01533(13) 0.6129(2) 0.0568(6) Uani 1 1 d . . . 
H30 H 0.9706 -0.0089 0.6624 0.068 Uiso 1 1 calc R . . 
C31 C 0.6583(3) -0.0111(2) 0.3834(3) 0.1057(13) Uani 1 1 d . . . 
H31A H 0.5827 -0.0123 0.4141 0.159 Uiso 1 1 calc R . . 
H31B H 0.6842 -0.0537 0.3706 0.159 Uiso 1 1 calc R . . 
H31C H 0.6477 0.0117 0.3144 0.159 Uiso 1 1 calc R . . 
C32 C 1.1366(2) 0.23220(14) 0.9193(3) 0.0676(7) Uani 1 1 d . . . 
H32A H 1.1600 0.1887 0.9114 0.101 Uiso 1 1 calc R . . 
H32B H 1.1612 0.2459 0.9943 0.101 Uiso 1 1 calc R . . 
H32C H 1.1751 0.2582 0.8690 0.101 Uiso 1 1 calc R . . 
 
loop_ 
 _atom_site_aniso_label 
 _atom_site_aniso_U_11 
 _atom_site_aniso_U_22 
 _atom_site_aniso_U_33 
 _atom_site_aniso_U_23 
 _atom_site_aniso_U_13 
 _atom_site_aniso_U_12 
S1 0.0411(3) 0.0623(4) 0.0595(4) -0.0073(3) 0.0109(3) -0.0003(3) 
O1 0.0382(10) 0.1048(16) 0.0743(13) -0.0123(11) 0.0134(9) -0.0062(9) 
O2 0.0409(10) 0.1055(16) 0.0799(13) -0.0252(12) 0.0034(9) -0.0178(10) 
O3 0.0485(10) 0.0613(10) 0.0492(9) -0.0135(8) 0.0100(7) -0.0083(8) 
O4 0.0469(11) 0.0914(15) 0.0911(14) -0.0212(11) -0.0011(9) 0.0173(10) 
O5 0.0738(13) 0.0695(12) 0.0747(13) -0.0066(10) 0.0331(10) -0.0184(10) 
O6 0.0949(17) 0.0780(14) 0.0762(15) 0.0196(11) -0.0055(12) 0.0023(12) 
N1 0.0517(12) 0.0458(10) 0.0510(11) -0.0007(9) 0.0100(9) -0.0021(8) 
C1 0.0430(15) 0.119(3) 0.078(2) -0.0149(19) 0.0039(13) -0.0087(16) 
C2 0.0433(13) 0.0700(16) 0.0500(14) -0.0064(12) 0.0032(10) -0.0125(11) 
C3 0.0445(13) 0.0583(14) 0.0505(14) -0.0106(11) 0.0098(10) -0.0063(10) 
C4 0.0408(12) 0.0525(12) 0.0387(11) -0.0004(9) 0.0073(9) -0.0066(9) 
C5 0.0441(12) 0.0552(13) 0.0403(12) -0.0012(10) 0.0069(9) -0.0062(10) 
C6 0.0450(13) 0.0648(15) 0.0503(14) -0.0071(12) 0.0134(10) -0.0003(11) 
C7 0.0387(13) 0.0763(17) 0.0518(14) -0.0001(12) 0.0111(10) -0.0032(11) 
C8 0.0418(12) 0.0475(12) 0.0436(12) 0.0011(10) 0.0065(9) -0.0014(9) 
C9 0.0403(12) 0.0544(13) 0.0469(13) 0.0012(10) 0.0036(10) -0.0028(10) 
C10 0.0405(12) 0.0550(13) 0.0520(14) -0.0072(11) 0.0047(10) -0.0106(10) 
C11 0.0417(12) 0.0513(13) 0.0526(14) -0.0041(11) 0.0032(10) -0.0073(10) 
C12 0.097(2) 0.0481(14) 0.0645(17) -0.0031(12) 0.0224(15) -0.0002(14) 
C13 0.101(2) 0.0649(17) 0.0568(17) -0.0007(13) 0.0186(16) -0.0087(16) 
C14 0.0524(15) 0.0598(15) 0.0661(17) 0.0062(13) -0.0025(12) -0.0058(12) 
C15 0.084(2) 0.0610(16) 0.075(2) -0.0017(14) 0.0008(15) 0.0197(15) 
C16 0.0679(18) 0.0629(16) 0.0607(16) -0.0091(13) 0.0025(13) 0.0113(13) 
C17 0.113(3) 0.104(3) 0.063(2) 0.0189(18) -0.0112(18) -0.019(2) 
C18 0.0729(18) 0.0497(14) 0.0601(16) 0.0026(12) 0.0073(13) -0.0070(12) 
C19 0.0651(16) 0.0453(12) 0.0528(14) 0.0073(11) 0.0059(12) -0.0050(11) 
C20 0.0680(19) 0.0721(18) 0.0660(18) 0.0087(14) 0.0042(14) 0.0066(15) 
C21 0.086(2) 0.090(2) 0.0601(19) 0.0097(16) -0.0106(16) -0.0068(18) 
C22 0.117(3) 0.085(2) 0.0557(18) 0.0005(15) 0.0098(19) -0.013(2) 
C23 0.092(3) 0.114(3) 0.074(2) 0.0045(19) 0.036(2) -0.009(2) 
C24 0.0678(19) 0.093(2) 0.0626(18) 0.0098(15) 0.0111(14) -0.0142(16) 
C25 0.0441(13) 0.0619(15) 0.0452(13) -0.0037(11) 0.0107(10) 0.0047(10) 
C26 0.0675(18) 0.0685(17) 0.0557(16) 0.0009(13) 0.0098(13) 0.0121(13) 
C27 0.0631(18) 0.102(2) 0.0494(16) -0.0024(15) 0.0028(13) 0.0212(17) 
C28 0.0502(15) 0.104(2) 0.0531(16) -0.0221(15) 0.0124(12) -0.0007(15) 
C29 0.0611(17) 0.0686(17) 0.0742(19) -0.0142(14) 0.0182(14) -0.0096(14) 
C30 0.0539(15) 0.0581(15) 0.0589(15) 0.0000(12) 0.0090(11) 0.0024(11) 
C31 0.071(2) 0.156(4) 0.088(2) -0.052(2) 0.0026(18) -0.008(2) 
C32 0.0450(15) 0.0707(17) 0.085(2) -0.0118(15) -0.0012(13) -0.0046(12) 
 
_geom_special_details 
; 
 All esds (except the esd in the dihedral angle between two l.s. planes) 
 are estimated using the full covariance matrix.  The cell esds are taken 
 into account individually in the estimation of esds in distances, angles 
 and torsion angles; correlations between esds in cell parameters are only 
 used when they are defined by crystal symmetry.  An approximate (isotropic) 
 treatment of cell esds is used for estimating esds involving l.s. planes. 
; 
 
loop_ 
 _geom_bond_atom_site_label_1 
 _geom_bond_atom_site_label_2 
 _geom_bond_distance 
 _geom_bond_site_symmetry_2 
 _geom_bond_publ_flag 
S1 O4 1.427(2) . ? 
S1 O5 1.430(2) . ? 
S1 N1 1.639(2) . ? 
S1 C25 1.756(3) . ? 
O1 C7 1.383(3) . ? 
O1 C1 1.444(3) . ? 
O2 C2 1.387(3) . ? 
O2 C1 1.425(4) . ? 
O3 C5 1.379(3) . ? 
O3 C10 1.462(3) . ? 
O6 C14 1.373(3) . ? 
O6 C17 1.430(4) . ? 
N1 C8 1.438(3) . ? 
N1 C18 1.491(3) . ? 
C1 H1A 0.9700 . ? 
C1 H1B 0.9700 . ? 
C2 C3 1.359(3) . ? 
C2 C7 1.385(4) . ? 
C3 C4 1.417(3) . ? 
C3 H3 0.9300 . ? 
C4 C5 1.404(3) . ? 
C4 C8 1.463(3) . ? 
C5 C6 1.385(3) . ? 
C6 C7 1.368(3) . ? 
C6 H6 0.9300 . ? 
C8 C9 1.340(3) . ? 
C9 C32 1.492(3) . ? 
C9 C10 1.510(3) . ? 
C10 C11 1.521(3) . ? 
C10 H10 0.9800 . ? 
C11 C16 1.384(3) . ? 
C11 C12 1.388(4) . ? 
C12 C13 1.387(4) . ? 
C12 H12 0.9300 . ? 
C13 C14 1.376(4) . ? 
C13 H13 0.9300 . ? 
C14 C15 1.384(4) . ? 
C15 C16 1.372(4) . ? 
C15 H15 0.9300 . ? 
C16 H16 0.9300 . ? 
C17 H17A 0.9600 . ? 
C17 H17B 0.9600 . ? 
C17 H17C 0.9600 . ? 
C18 C19 1.508(4) . ? 
C18 H18A 0.9700 . ? 
C18 H18B 0.9700 . ? 
C19 C20 1.380(4) . ? 
C19 C24 1.385(4) . ? 
C20 C21 1.375(4) . ? 
C20 H20 0.9300 . ? 
C21 C22 1.364(5) . ? 
C21 H21 0.9300 . ? 
C22 C23 1.369(5) . ? 
C22 H22 0.9300 . ? 
C23 C24 1.392(5) . ? 
C23 H23 0.9300 . ? 
C24 H24 0.9300 . ? 
C25 C30 1.385(4) . ? 
C25 C26 1.392(4) . ? 
C26 C27 1.371(4) . ? 
C26 H26 0.9300 . ? 
C27 C28 1.387(4) . ? 
C27 H27 0.9300 . ? 
C28 C29 1.387(4) . ? 
C28 C31 1.507(4) . ? 
C29 C30 1.384(4) . ? 
C29 H29 0.9300 . ? 
C30 H30 0.9300 . ? 
C31 H31A 0.9600 . ? 
C31 H31B 0.9600 . ? 
C31 H31C 0.9600 . ? 
C32 H32A 0.9600 . ? 
C32 H32B 0.9600 . ? 
C32 H32C 0.9600 . ? 
 
loop_ 
 _geom_angle_atom_site_label_1 
 _geom_angle_atom_site_label_2 
 _geom_angle_atom_site_label_3 
 _geom_angle 
 _geom_angle_site_symmetry_1 
 _geom_angle_site_symmetry_3 
 _geom_angle_publ_flag 
O4 S1 O5 119.27(13) . . ? 
O4 S1 N1 107.21(12) . . ? 
O5 S1 N1 107.28(10) . . ? 
O4 S1 C25 106.77(12) . . ? 
O5 S1 C25 108.58(12) . . ? 
N1 S1 C25 107.17(11) . . ? 
C7 O1 C1 103.6(2) . . ? 
C2 O2 C1 104.3(2) . . ? 
C5 O3 C10 113.85(17) . . ? 
C14 O6 C17 117.8(3) . . ? 
C8 N1 C18 119.05(19) . . ? 
C8 N1 S1 121.70(15) . . ? 
C18 N1 S1 118.28(16) . . ? 
O2 C1 O1 107.5(2) . . ? 
O2 C1 H1A 110.2 . . ? 
O1 C1 H1A 110.2 . . ? 
O2 C1 H1B 110.2 . . ? 
O1 C1 H1B 110.2 . . ? 
H1A C1 H1B 108.5 . . ? 
C3 C2 C7 122.2(2) . . ? 
C3 C2 O2 128.3(2) . . ? 
C7 C2 O2 109.5(2) . . ? 
C2 C3 C4 117.7(2) . . ? 
C2 C3 H3 121.1 . . ? 
C4 C3 H3 121.1 . . ? 
C5 C4 C3 118.3(2) . . ? 
C5 C4 C8 117.7(2) . . ? 
C3 C4 C8 123.8(2) . . ? 
O3 C5 C6 116.9(2) . . ? 
O3 C5 C4 119.7(2) . . ? 
C6 C5 C4 123.3(2) . . ? 
C7 C6 C5 116.0(2) . . ? 
C7 C6 H6 122.0 . . ? 
C5 C6 H6 122.0 . . ? 
C6 C7 O1 128.0(2) . . ? 
C6 C7 C2 122.3(2) . . ? 
O1 C7 C2 109.7(2) . . ? 
C9 C8 N1 121.0(2) . . ? 
C9 C8 C4 120.1(2) . . ? 
N1 C8 C4 118.7(2) . . ? 
C8 C9 C32 126.9(2) . . ? 
C8 C9 C10 116.2(2) . . ? 
C32 C9 C10 116.9(2) . . ? 
O3 C10 C9 110.69(18) . . ? 
O3 C10 C11 110.46(19) . . ? 
C9 C10 C11 114.34(19) . . ? 
O3 C10 H10 107.0 . . ? 
C9 C10 H10 107.0 . . ? 
C11 C10 H10 107.0 . . ? 
C16 C11 C12 116.6(2) . . ? 
C16 C11 C10 119.8(2) . . ? 
C12 C11 C10 123.6(2) . . ? 
C13 C12 C11 122.1(3) . . ? 
C13 C12 H12 118.9 . . ? 
C11 C12 H12 118.9 . . ? 
C14 C13 C12 119.5(3) . . ? 
C14 C13 H13 120.2 . . ? 
C12 C13 H13 120.2 . . ? 
O6 C14 C13 124.8(3) . . ? 
O6 C14 C15 115.8(3) . . ? 
C13 C14 C15 119.4(3) . . ? 
C16 C15 C14 120.1(3) . . ? 
C16 C15 H15 120.0 . . ? 
C14 C15 H15 120.0 . . ? 
C15 C16 C11 122.2(3) . . ? 
C15 C16 H16 118.9 . . ? 
C11 C16 H16 118.9 . . ? 
O6 C17 H17A 109.5 . . ? 
O6 C17 H17B 109.5 . . ? 
H17A C17 H17B 109.5 . . ? 
O6 C17 H17C 109.5 . . ? 
H17A C17 H17C 109.5 . . ? 
H17B C17 H17C 109.5 . . ? 
N1 C18 C19 110.6(2) . . ? 
N1 C18 H18A 109.5 . . ? 
C19 C18 H18A 109.5 . . ? 
N1 C18 H18B 109.5 . . ? 
C19 C18 H18B 109.5 . . ? 
H18A C18 H18B 108.1 . . ? 
C20 C19 C24 118.4(3) . . ? 
C20 C19 C18 120.9(3) . . ? 
C24 C19 C18 120.7(3) . . ? 
C21 C20 C19 121.5(3) . . ? 
C21 C20 H20 119.2 . . ? 
C19 C20 H20 119.2 . . ? 
C22 C21 C20 120.0(3) . . ? 
C22 C21 H21 120.0 . . ? 
C20 C21 H21 120.0 . . ? 
C21 C22 C23 119.6(3) . . ? 
C21 C22 H22 120.2 . . ? 
C23 C22 H22 120.2 . . ? 
C22 C23 C24 120.9(3) . . ? 
C22 C23 H23 119.6 . . ? 
C24 C23 H23 119.6 . . ? 
C19 C24 C23 119.6(3) . . ? 
C19 C24 H24 120.2 . . ? 
C23 C24 H24 120.2 . . ? 
C30 C25 C26 120.0(2) . . ? 
C30 C25 S1 119.84(19) . . ? 
C26 C25 S1 120.1(2) . . ? 
C27 C26 C25 119.4(3) . . ? 
C27 C26 H26 120.3 . . ? 
C25 C26 H26 120.3 . . ? 
C26 C27 C28 121.7(3) . . ? 
C26 C27 H27 119.1 . . ? 
C28 C27 H27 119.1 . . ? 
C27 C28 C29 118.2(3) . . ? 
C27 C28 C31 121.5(3) . . ? 
C29 C28 C31 120.2(3) . . ? 
C30 C29 C28 121.1(3) . . ? 
C30 C29 H29 119.5 . . ? 
C28 C29 H29 119.5 . . ? 
C29 C30 C25 119.6(3) . . ? 
C29 C30 H30 120.2 . . ? 
C25 C30 H30 120.2 . . ? 
C28 C31 H31A 109.5 . . ? 
C28 C31 H31B 109.5 . . ? 
H31A C31 H31B 109.5 . . ? 
C28 C31 H31C 109.5 . . ? 
H31A C31 H31C 109.5 . . ? 
H31B C31 H31C 109.5 . . ? 
C9 C32 H32A 109.5 . . ? 
C9 C32 H32B 109.5 . . ? 
H32A C32 H32B 109.5 . . ? 
C9 C32 H32C 109.5 . . ? 
H32A C32 H32C 109.5 . . ? 
H32B C32 H32C 109.5 . . ? 
 
loop_ 
 _geom_torsion_atom_site_label_1 
 _geom_torsion_atom_site_label_2 
 _geom_torsion_atom_site_label_3 
 _geom_torsion_atom_site_label_4 
 _geom_torsion 
 _geom_torsion_site_symmetry_1 
 _geom_torsion_site_symmetry_2 
 _geom_torsion_site_symmetry_3 
 _geom_torsion_site_symmetry_4 
 _geom_torsion_publ_flag 
O4 S1 N1 C8 142.21(19) . . . . ? 
O5 S1 N1 C8 13.0(2) . . . . ? 
C25 S1 N1 C8 -103.5(2) . . . . ? 
O4 S1 N1 C18 -49.2(2) . . . . ? 
O5 S1 N1 C18 -178.45(19) . . . . ? 
C25 S1 N1 C18 65.1(2) . . . . ? 
C2 O2 C1 O1 -22.4(3) . . . . ? 
C7 O1 C1 O2 23.0(3) . . . . ? 
C1 O2 C2 C3 -168.8(3) . . . . ? 
C1 O2 C2 C7 13.3(3) . . . . ? 
C7 C2 C3 C4 -2.3(4) . . . . ? 
O2 C2 C3 C4 -180.0(2) . . . . ? 
C2 C3 C4 C5 -1.8(3) . . . . ? 
C2 C3 C4 C8 173.2(2) . . . . ? 
C10 O3 C5 C6 -153.7(2) . . . . ? 
C10 O3 C5 C4 29.0(3) . . . . ? 
C3 C4 C5 O3 -177.3(2) . . . . ? 
C8 C4 C5 O3 7.4(3) . . . . ? 
C3 C4 C5 C6 5.5(4) . . . . ? 
C8 C4 C5 C6 -169.8(2) . . . . ? 
O3 C5 C6 C7 178.0(2) . . . . ? 
C4 C5 C6 C7 -4.8(4) . . . . ? 
C5 C6 C7 O1 -179.5(2) . . . . ? 
C5 C6 C7 C2 0.5(4) . . . . ? 
C1 O1 C7 C6 165.2(3) . . . . ? 
C1 O1 C7 C2 -14.8(3) . . . . ? 
C3 C2 C7 C6 3.1(4) . . . . ? 
O2 C2 C7 C6 -178.8(2) . . . . ? 
C3 C2 C7 O1 -176.9(2) . . . . ? 
O2 C2 C7 O1 1.1(3) . . . . ? 
C18 N1 C8 C9 114.6(3) . . . . ? 
S1 N1 C8 C9 -77.0(3) . . . . ? 
C18 N1 C8 C4 -59.9(3) . . . . ? 
S1 N1 C8 C4 108.6(2) . . . . ? 
C5 C4 C8 C9 -19.2(3) . . . . ? 
C3 C4 C8 C9 165.7(2) . . . . ? 
C5 C4 C8 N1 155.3(2) . . . . ? 
C3 C4 C8 N1 -19.7(3) . . . . ? 
N1 C8 C9 C32 0.8(4) . . . . ? 
C4 C8 C9 C32 175.1(2) . . . . ? 
N1 C8 C9 C10 179.23(19) . . . . ? 
C4 C8 C9 C10 -6.4(3) . . . . ? 
C5 O3 C10 C9 -52.6(3) . . . . ? 
C5 O3 C10 C11 75.1(2) . . . . ? 
C8 C9 C10 O3 41.4(3) . . . . ? 
C32 C9 C10 O3 -140.0(2) . . . . ? 
C8 C9 C10 C11 -84.1(3) . . . . ? 
C32 C9 C10 C11 94.5(3) . . . . ? 
O3 C10 C11 C16 61.9(3) . . . . ? 
C9 C10 C11 C16 -172.5(2) . . . . ? 
O3 C10 C11 C12 -116.8(3) . . . . ? 
C9 C10 C11 C12 8.8(3) . . . . ? 
C16 C11 C12 C13 -1.1(4) . . . . ? 
C10 C11 C12 C13 177.6(3) . . . . ? 
C11 C12 C13 C14 0.3(5) . . . . ? 
C17 O6 C14 C13 1.2(4) . . . . ? 
C17 O6 C14 C15 -178.4(3) . . . . ? 
C12 C13 C14 O6 -179.2(3) . . . . ? 
C12 C13 C14 C15 0.4(5) . . . . ? 
O6 C14 C15 C16 179.5(3) . . . . ? 
C13 C14 C15 C16 -0.2(5) . . . . ? 
C14 C15 C16 C11 -0.7(5) . . . . ? 
C12 C11 C16 C15 1.3(4) . . . . ? 
C10 C11 C16 C15 -177.5(3) . . . . ? 
C8 N1 C18 C19 -40.0(3) . . . . ? 
S1 N1 C18 C19 151.13(19) . . . . ? 
N1 C18 C19 C20 -71.3(3) . . . . ? 
N1 C18 C19 C24 106.2(3) . . . . ? 
C24 C19 C20 C21 -0.9(4) . . . . ? 
C18 C19 C20 C21 176.7(3) . . . . ? 
C19 C20 C21 C22 0.9(5) . . . . ? 
C20 C21 C22 C23 0.0(5) . . . . ? 
C21 C22 C23 C24 -0.9(5) . . . . ? 
C20 C19 C24 C23 0.0(5) . . . . ? 
C18 C19 C24 C23 -177.6(3) . . . . ? 
C22 C23 C24 C19 0.9(5) . . . . ? 
O4 S1 C25 C30 24.9(2) . . . . ? 
O5 S1 C25 C30 154.7(2) . . . . ? 
N1 S1 C25 C30 -89.7(2) . . . . ? 
O4 S1 C25 C26 -156.8(2) . . . . ? 
O5 S1 C25 C26 -27.0(2) . . . . ? 
N1 S1 C25 C26 88.6(2) . . . . ? 
C30 C25 C26 C27 0.5(4) . . . . ? 
S1 C25 C26 C27 -177.8(2) . . . . ? 
C25 C26 C27 C28 -0.6(4) . . . . ? 
C26 C27 C28 C29 -0.3(4) . . . . ? 
C26 C27 C28 C31 179.5(3) . . . . ? 
C27 C28 C29 C30 1.2(4) . . . . ? 
C31 C28 C29 C30 -178.5(3) . . . . ? 
C28 C29 C30 C25 -1.3(4) . . . . ? 
C26 C25 C30 C29 0.4(4) . . . . ? 
S1 C25 C30 C29 178.73(19) . . . . ? 
 
_diffrn_measured_fraction_theta_max    0.997 
_diffrn_reflns_theta_full              26.00 
_diffrn_measured_fraction_theta_full   0.997 
_refine_diff_density_max    0.190 
_refine_diff_density_min   -0.310 
_refine_diff_density_rms    0.036 
